# Supplementary material
Source: PubMed Central journal article supplement (PMC3770335)

# Source Data Figure 2

## Figure 2A

Caspase

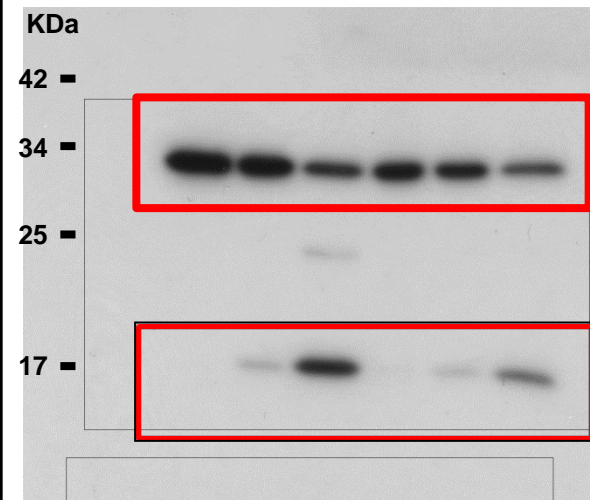

tubulin

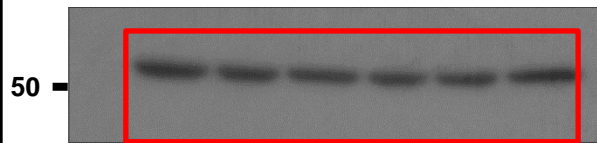

## Figure 2B

KDa Caspase

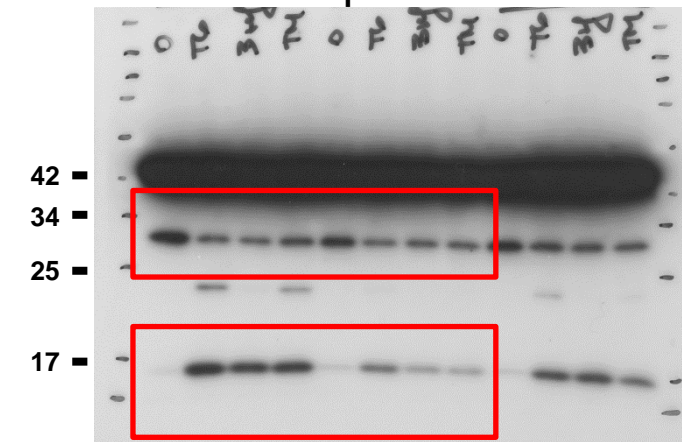

KDa tubulin

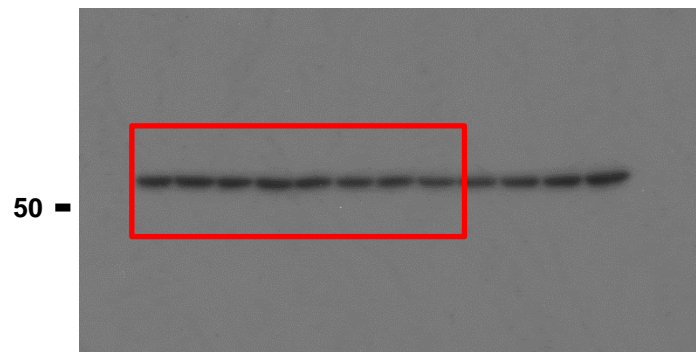

# Source Data Figure 2

## Figure 2E

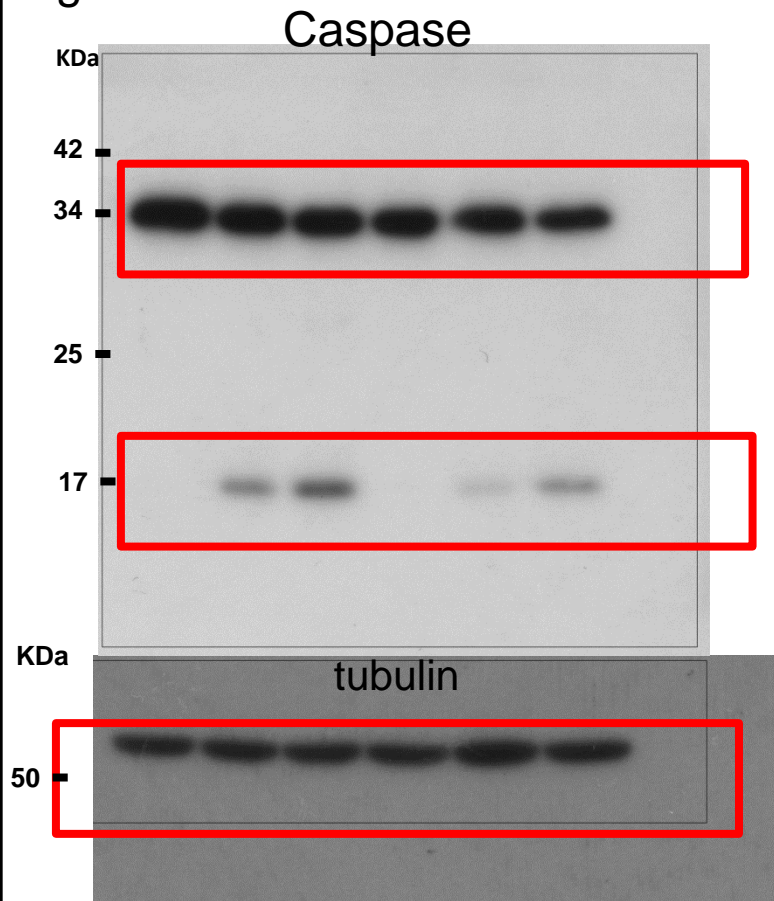

## Figure 2I

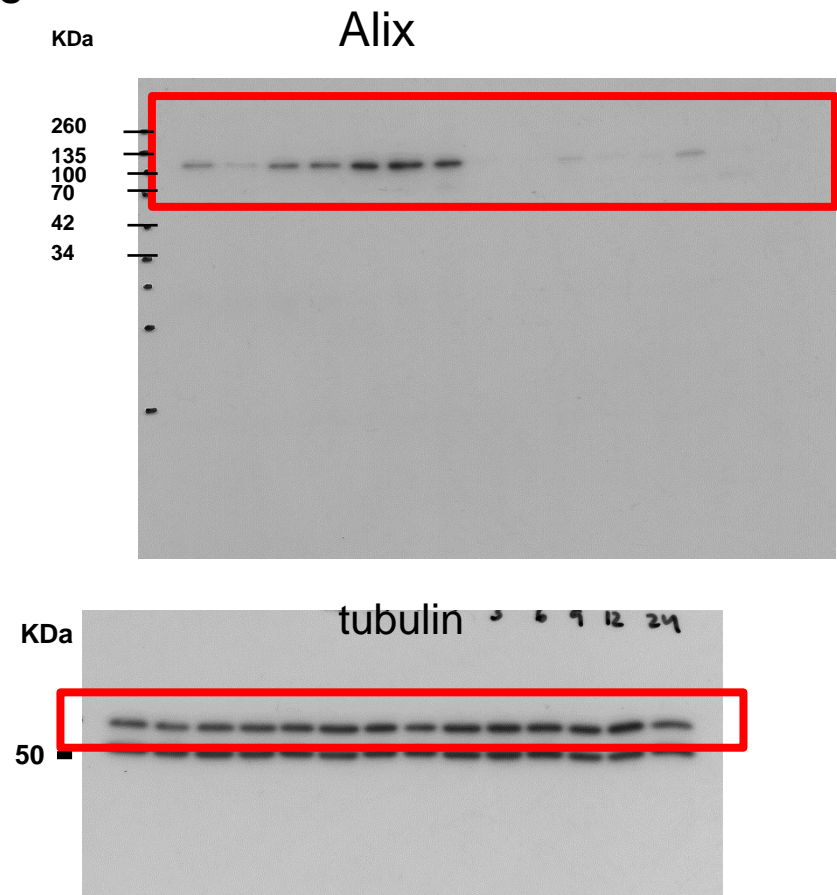

Supplement: emboj2013168df2.pdf [file emboj2013168df2.pdf]
