# Supplementary material
Source: PubMed Central journal article supplement (PMC3770335)

Source Data Figure 4

Source Data Figure 4B

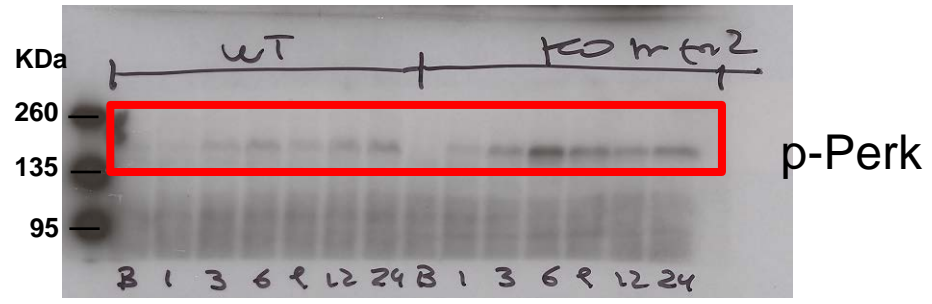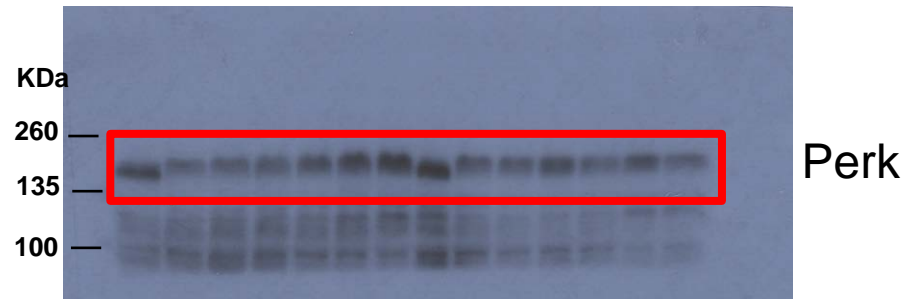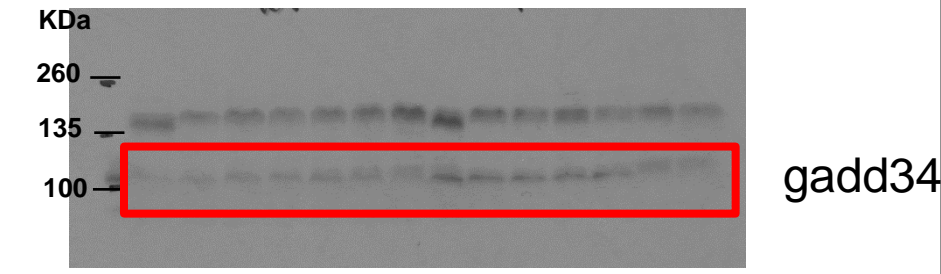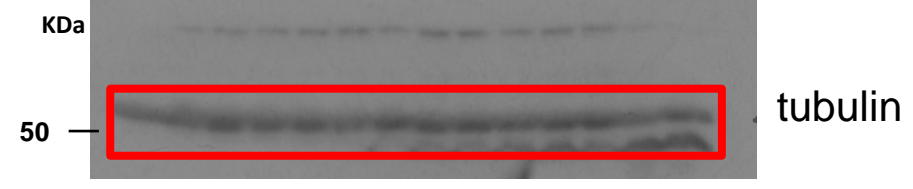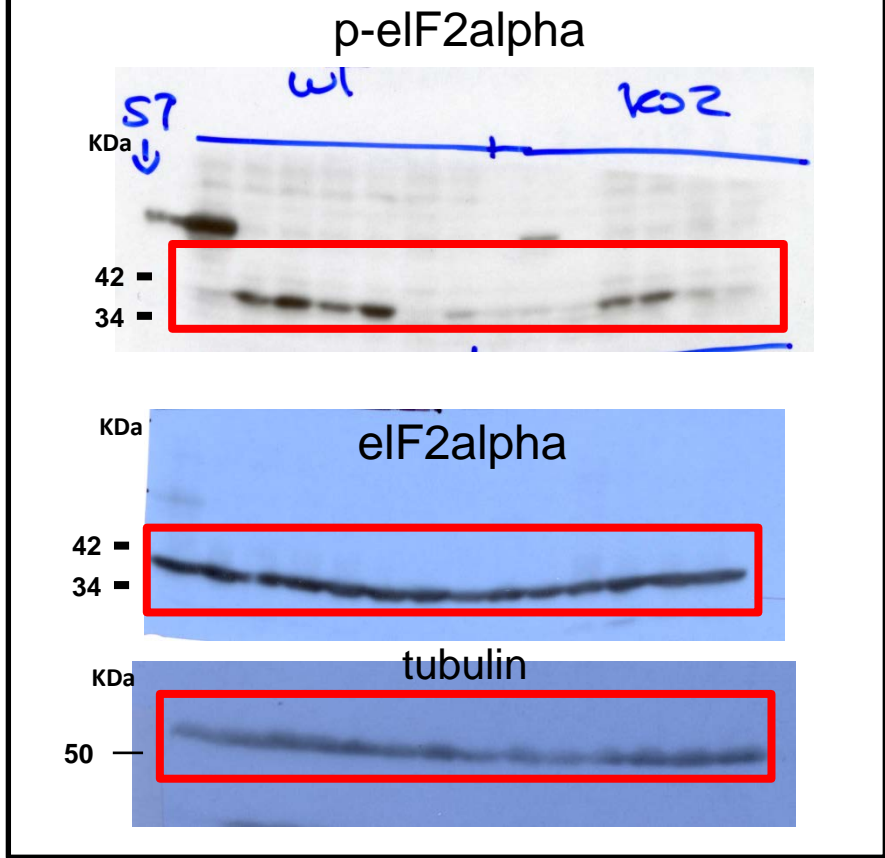

# Source Data Figure 4B

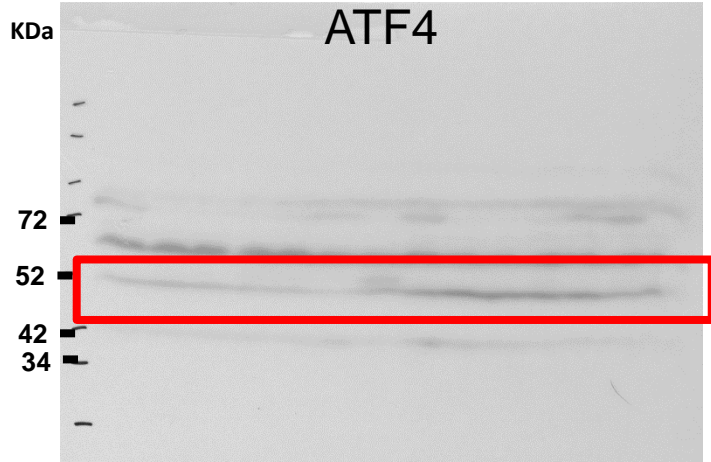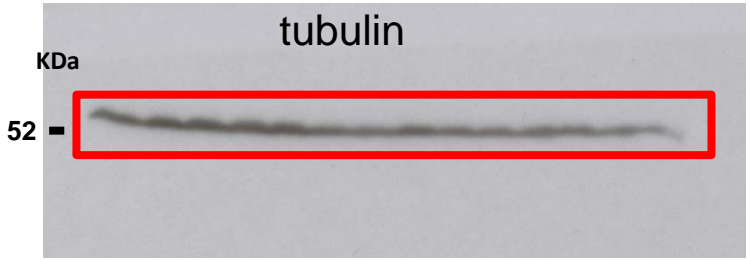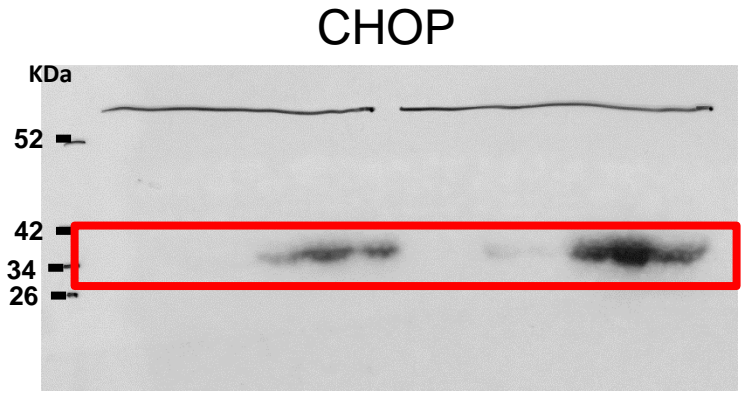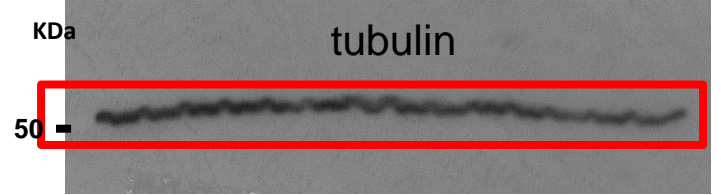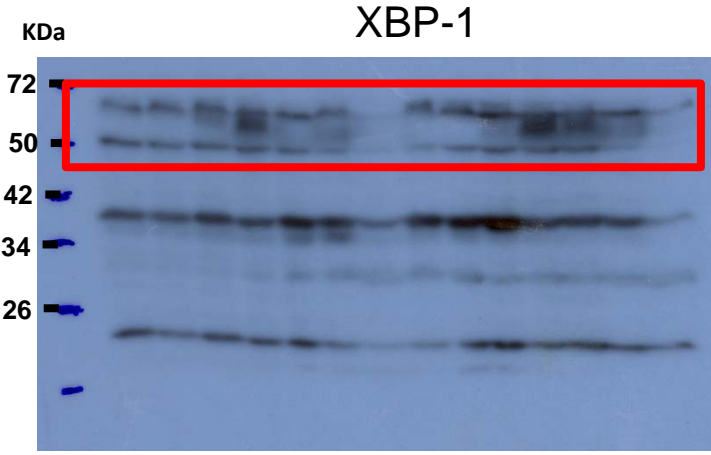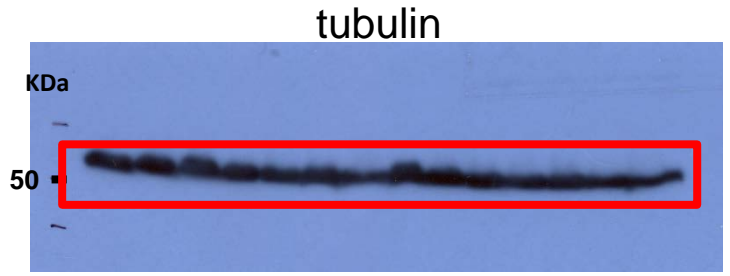

# Source Data Figure 4D

ATF4

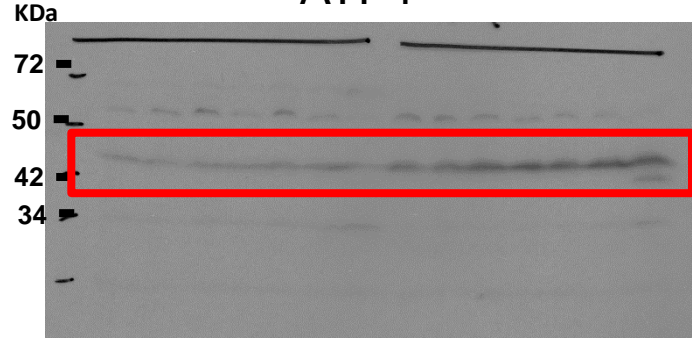

p-eIF2alpha

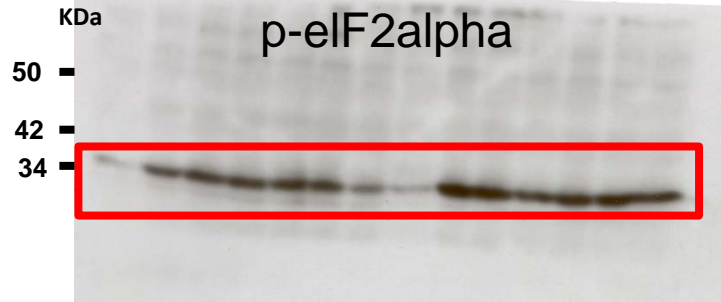

eIF2alpha

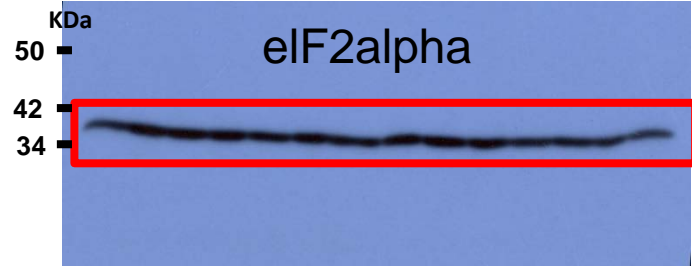

tubulin

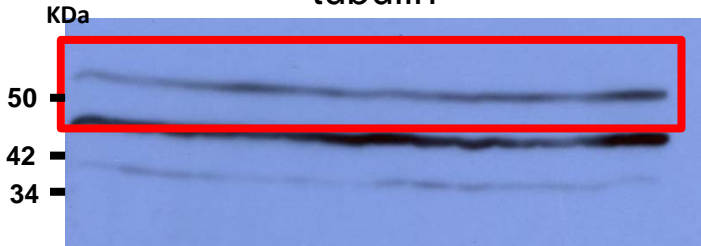

Supplement: emboj2013168df4.pdf [file emboj2013168df4.pdf]
