# Supplementary material
Source: PubMed Central journal article supplement (PMC3770335)

# Source Data Figure 7A

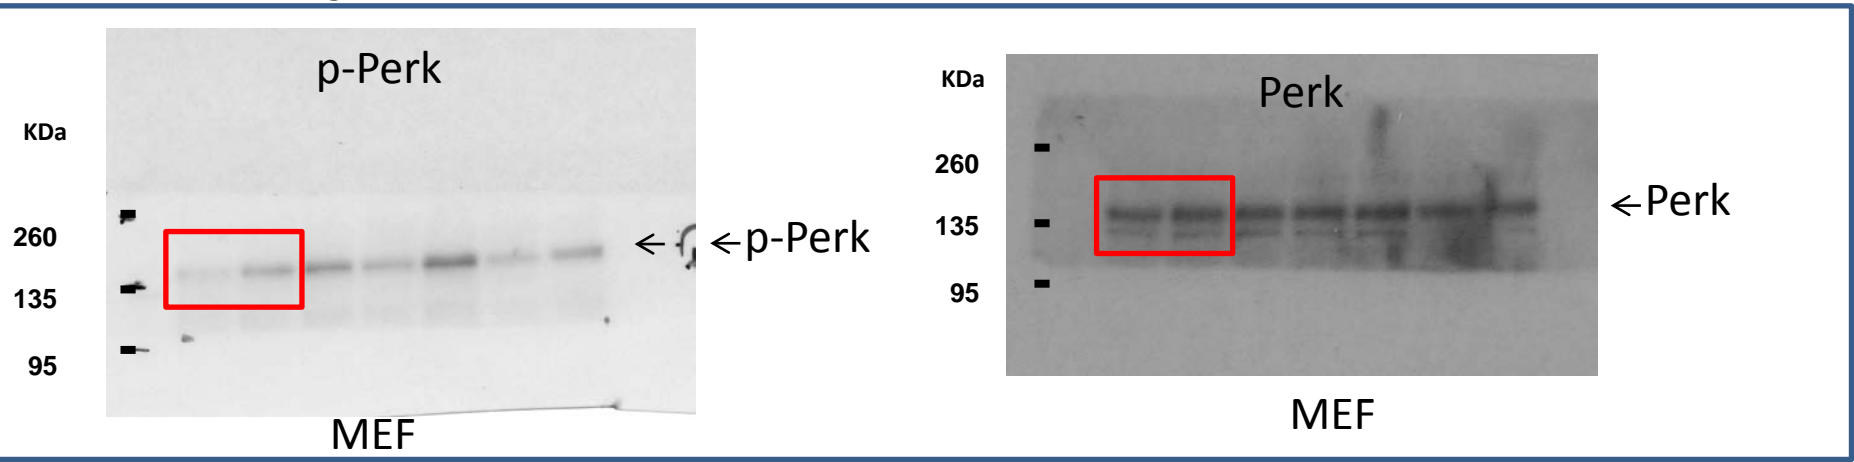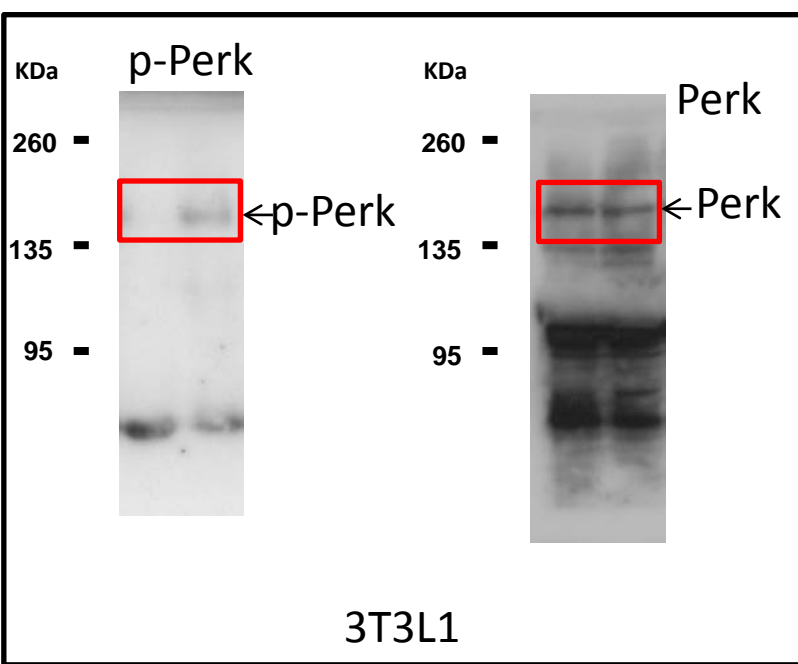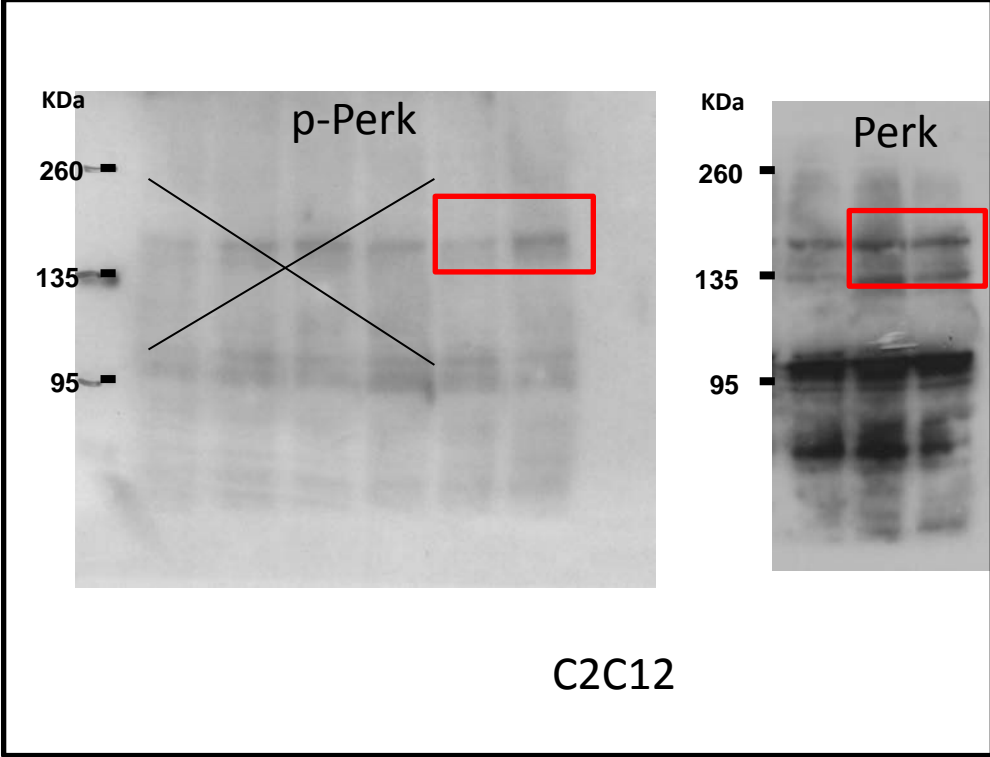

# Source Data Figure 7A

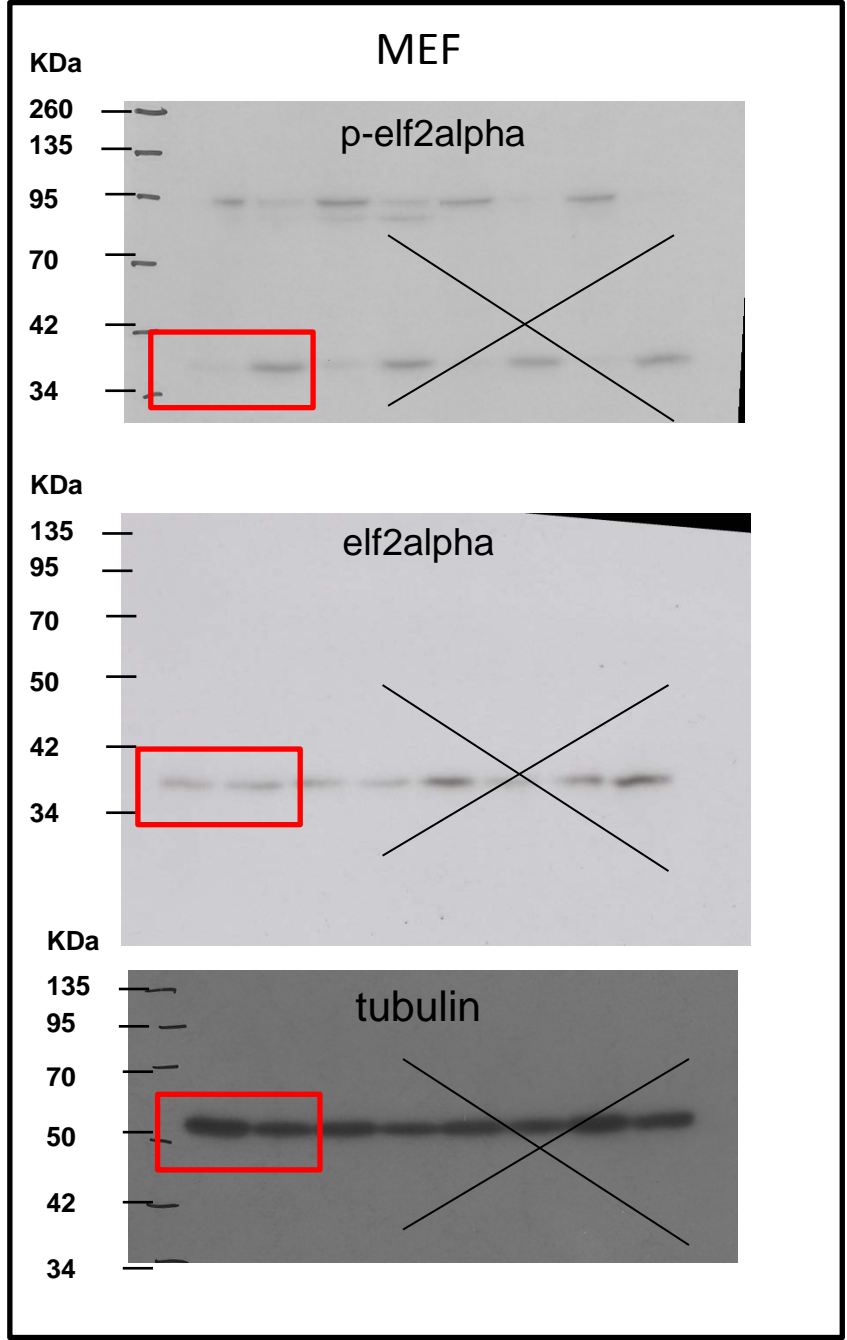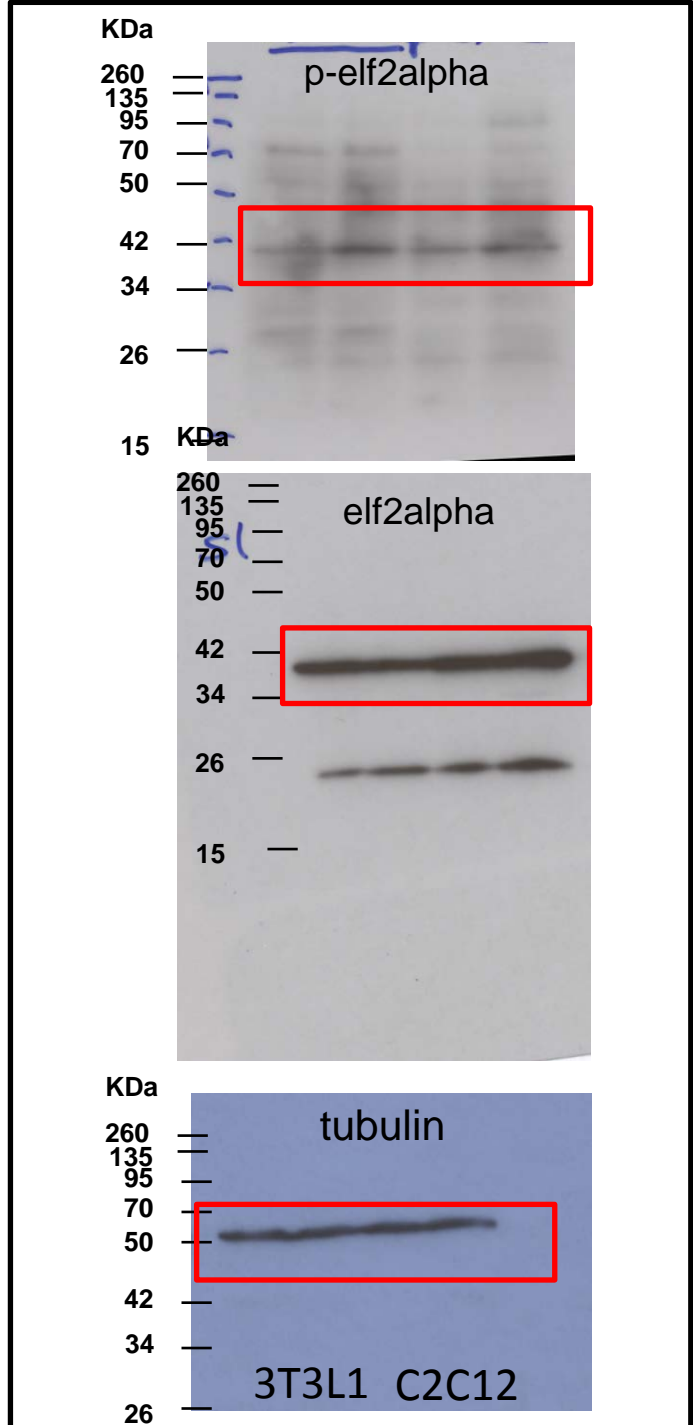

# Source Data Figure 7C

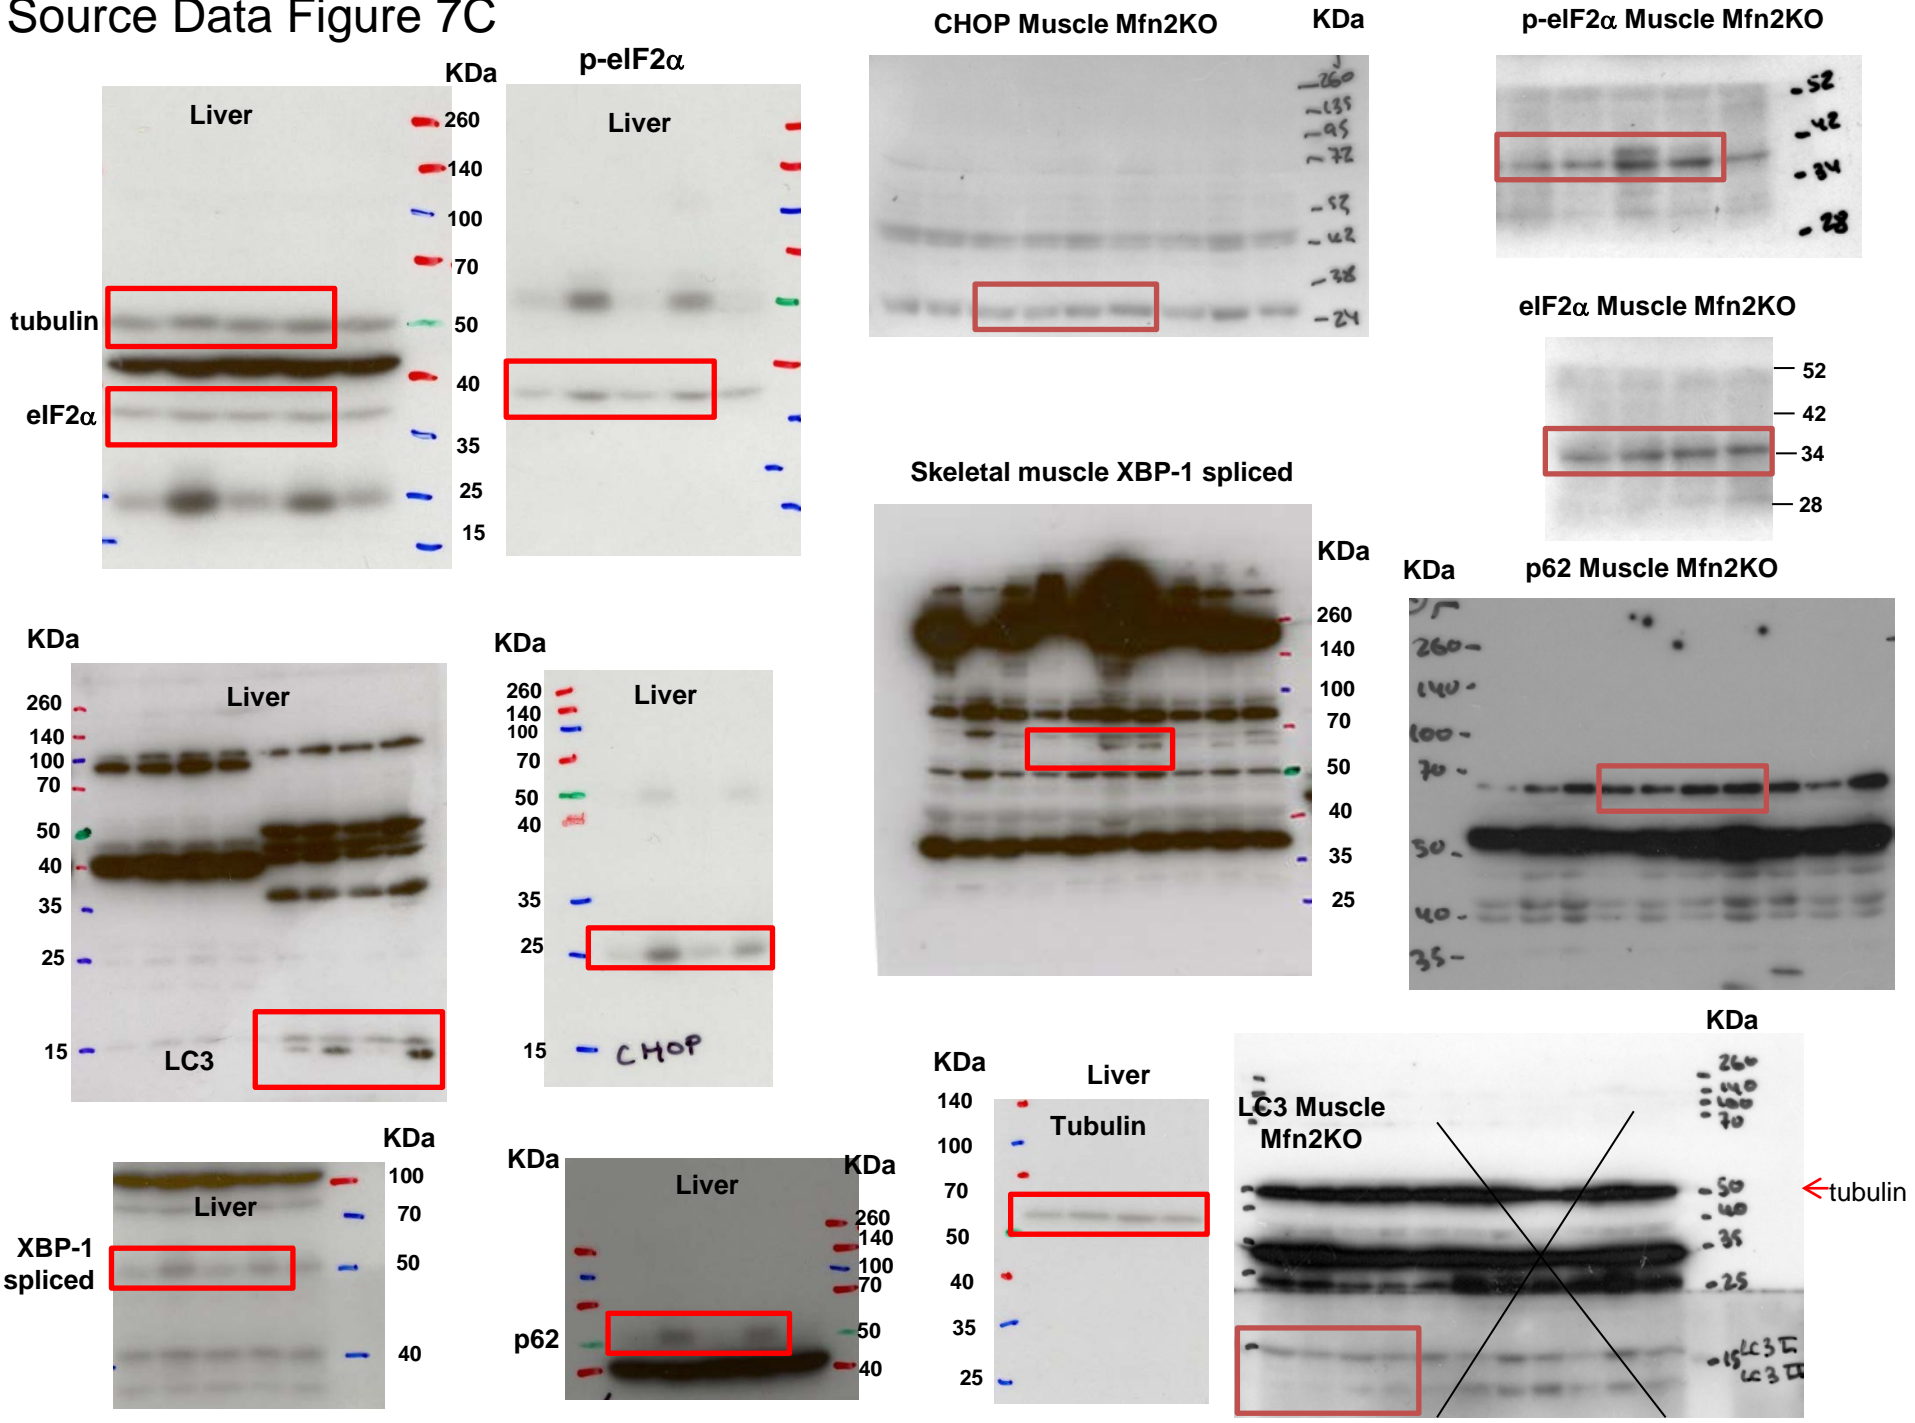

# Source Data Figure 7E

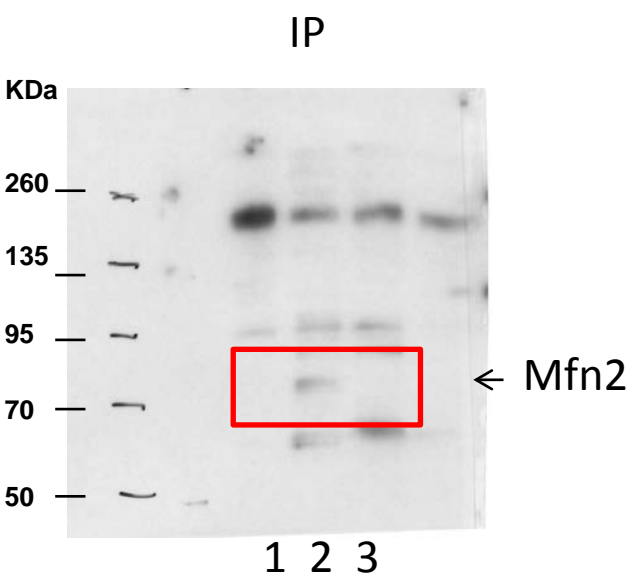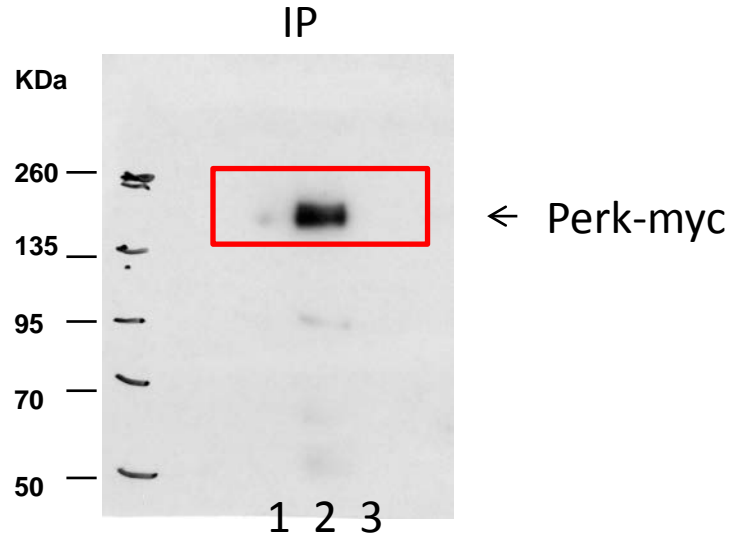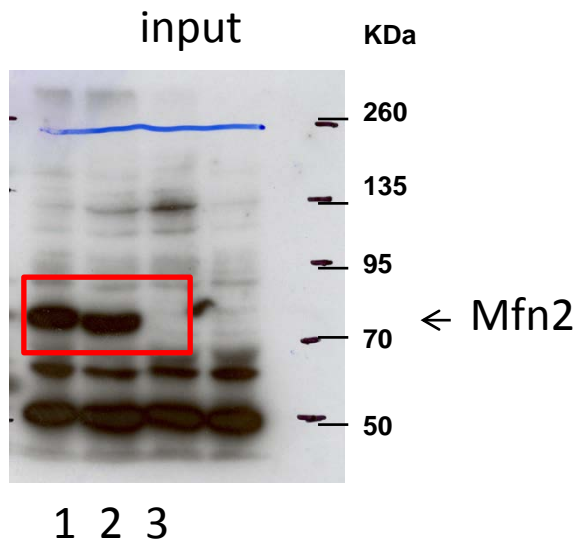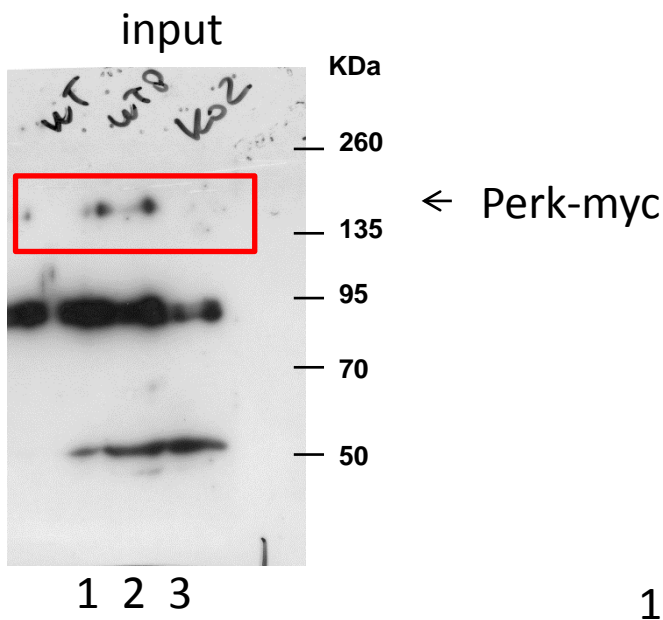

- 1.- WT Babe
- 2.- WT Perk -Myc
- 3.- KO Mfn2 Babe

Source Data Figure 7F

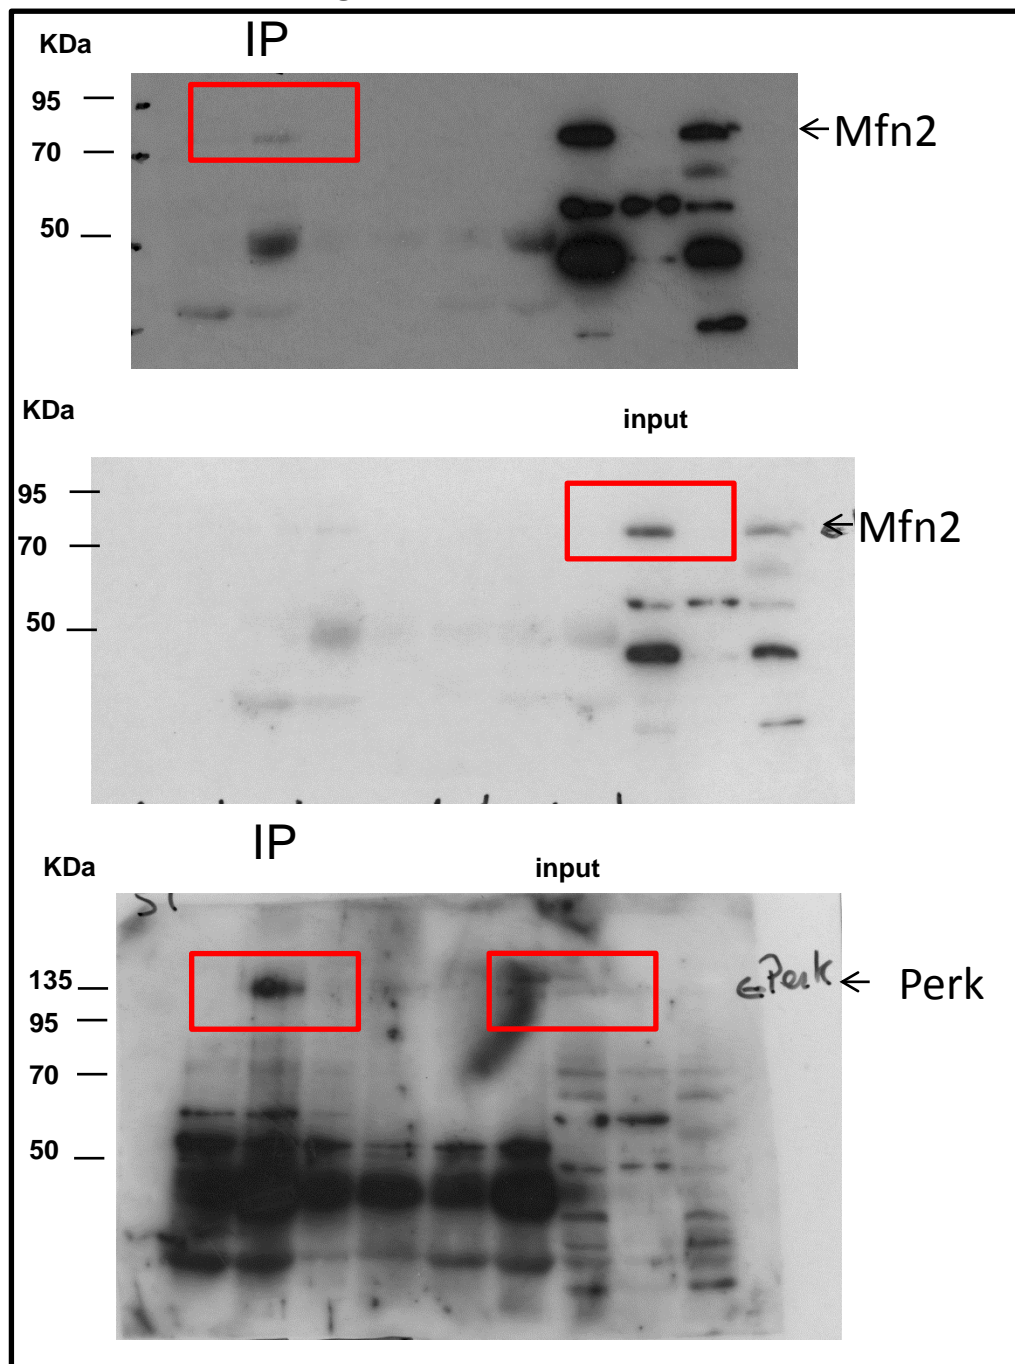

Source Data Figure Supplementary 1

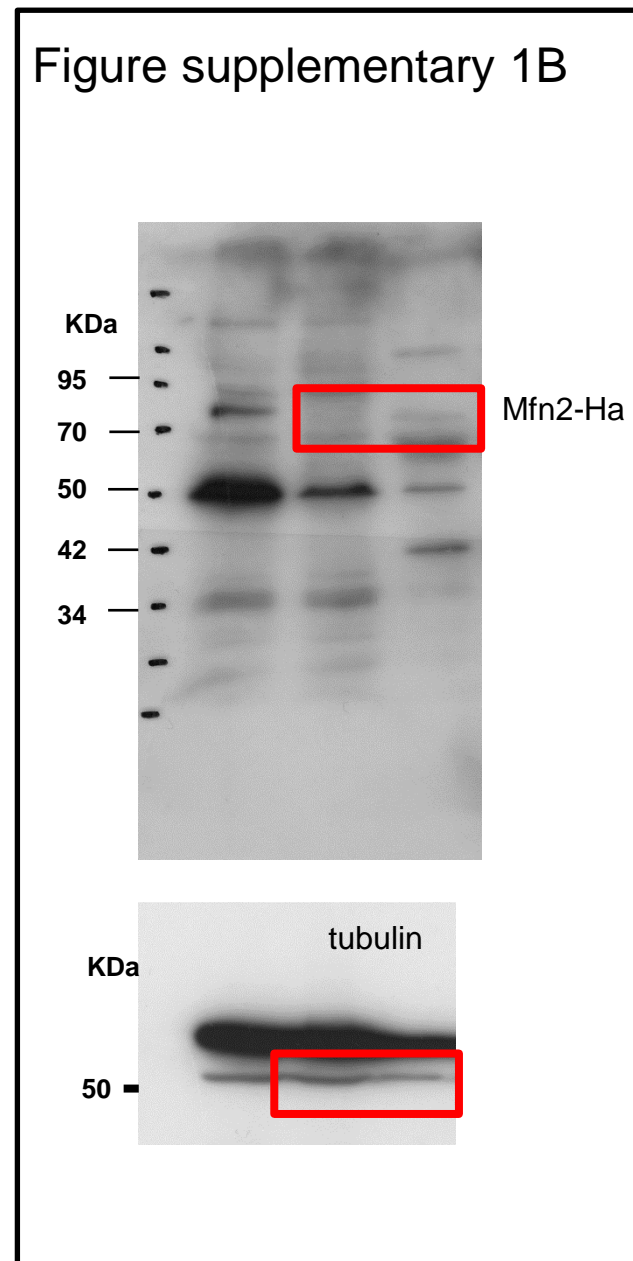

Supplement: emboj2013168df7.pdf [file emboj2013168df7.pdf]
