# Supplementary material
Source: PubMed Central journal article supplement (PMC3770335)
Supplement: emboj2013168dfs3.pdf [file emboj2013168dfs3.pdf]

# Figure supplementary 3

## Figure supplementary 3B

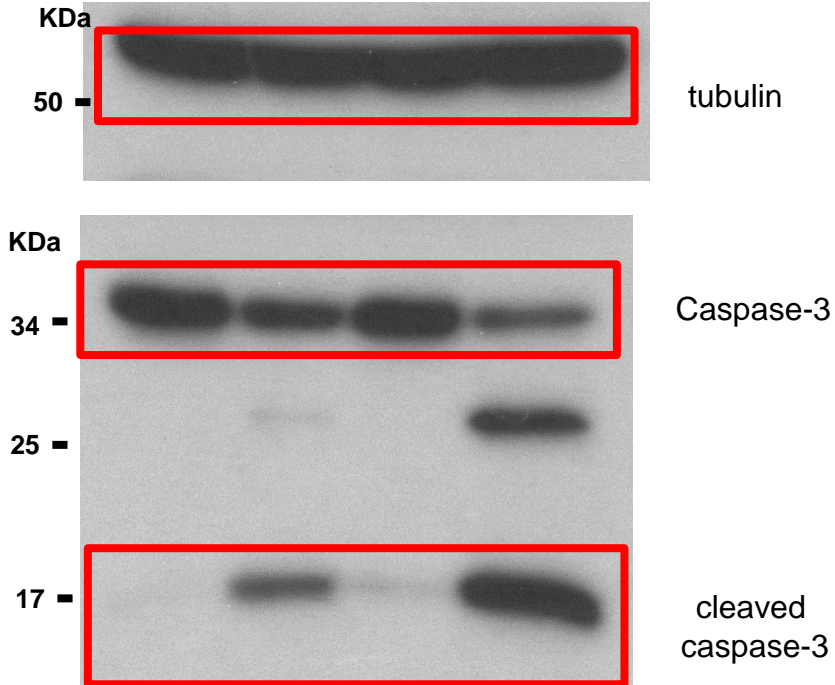

## Figure supplementary 3C

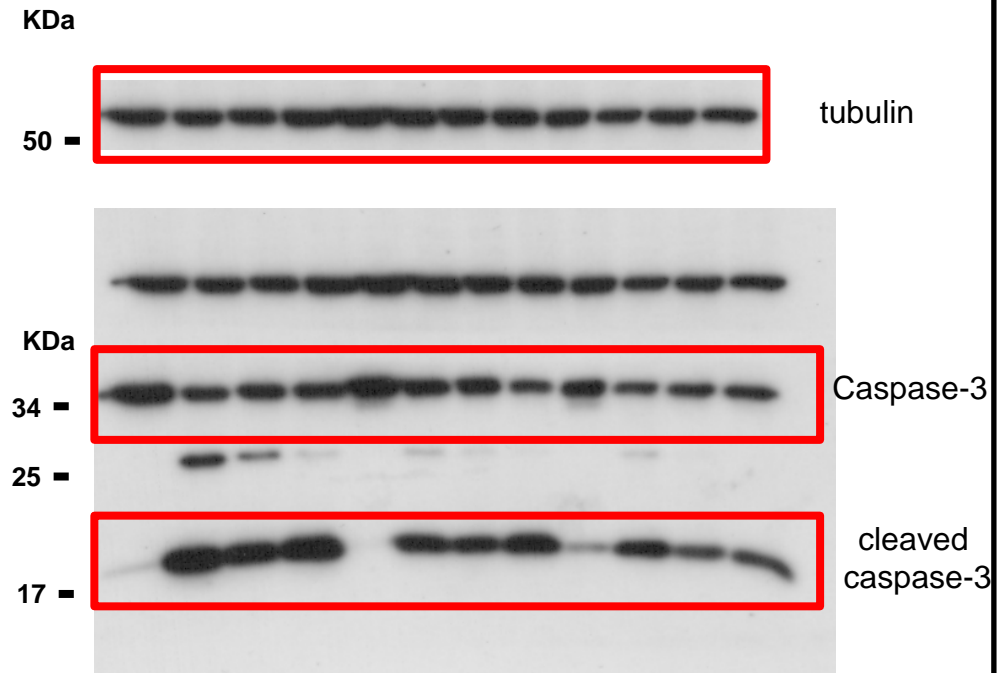

Figure supplementary 3E

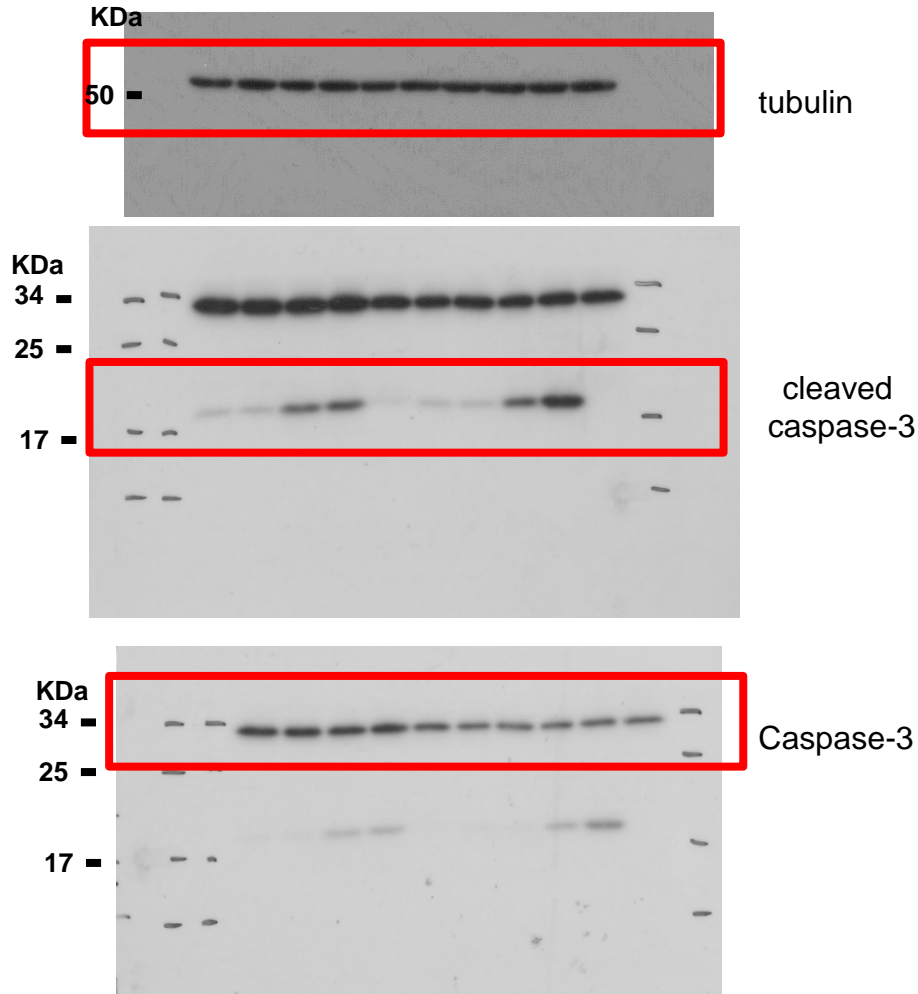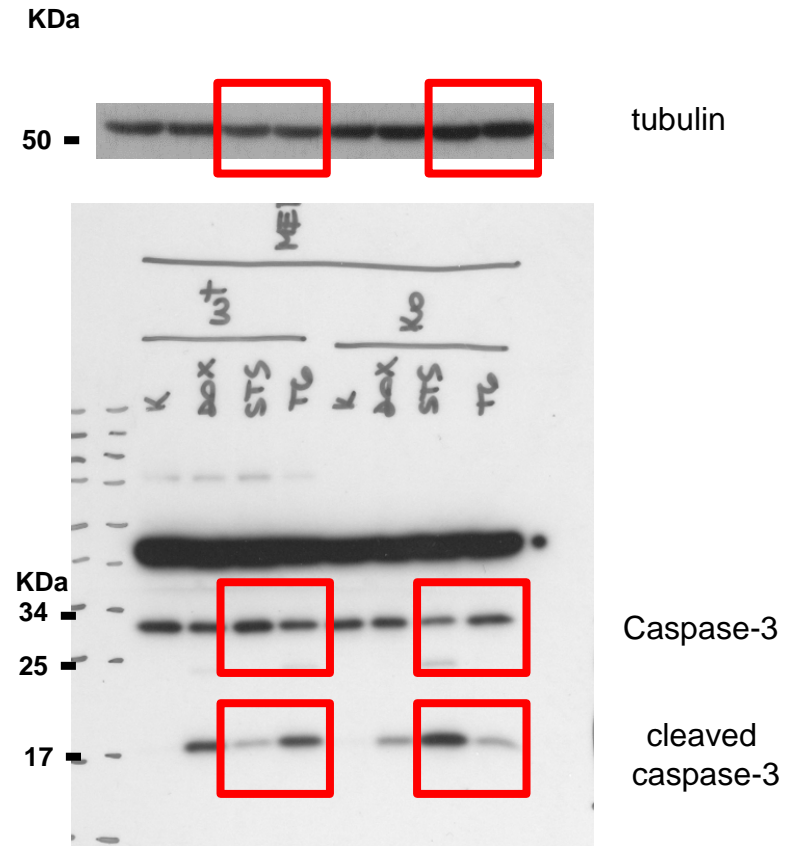

# Figure supplementary 3F

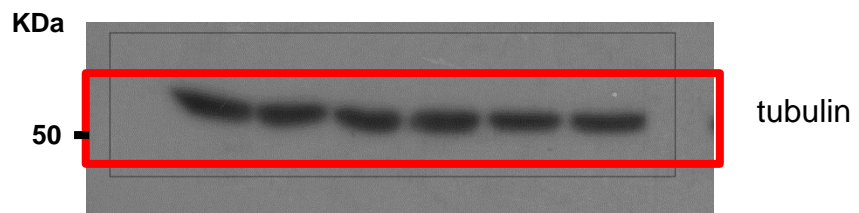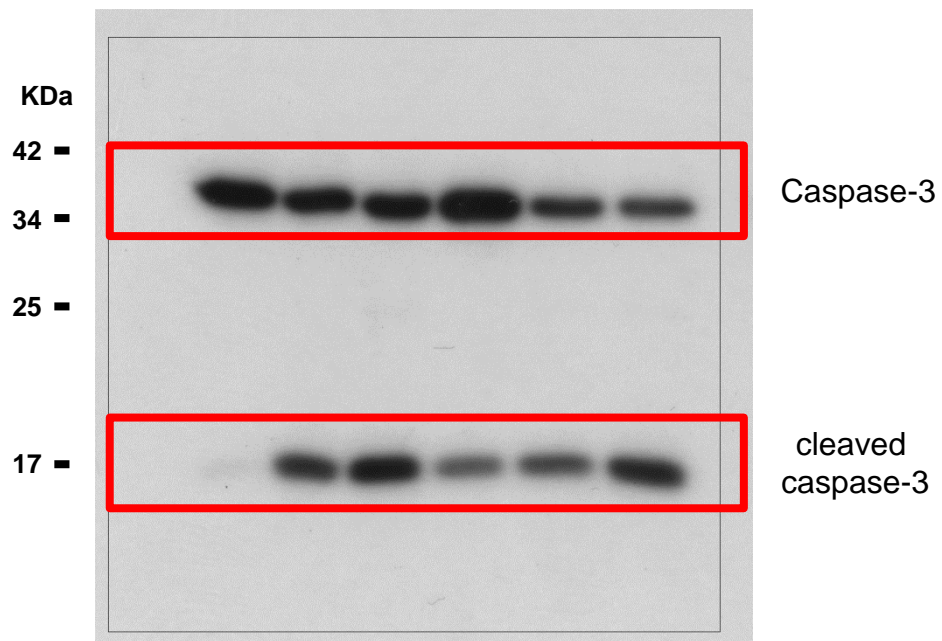

—

—

■

—

—

■
