# Supplementary material
Source: PubMed Central journal article supplement (PMC3770335)

# Source Data Figure 3

## Figure 3A

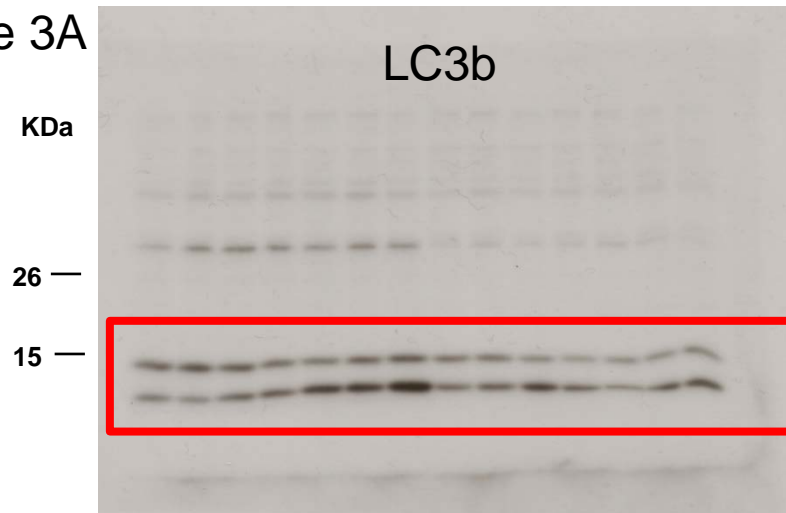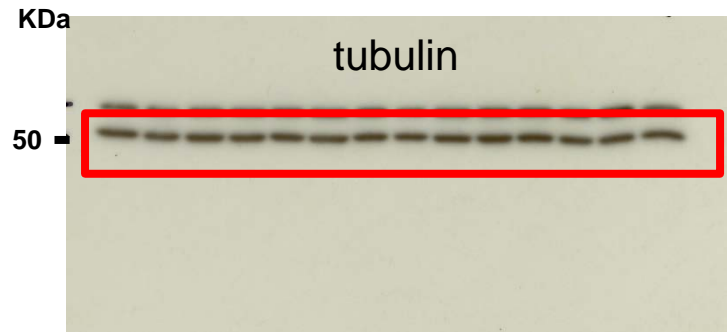

## Figure 3B

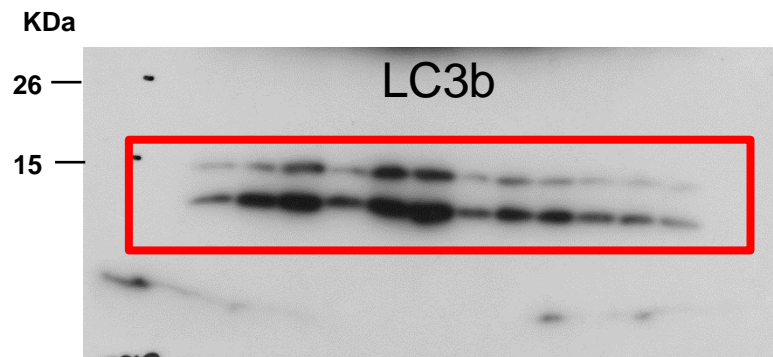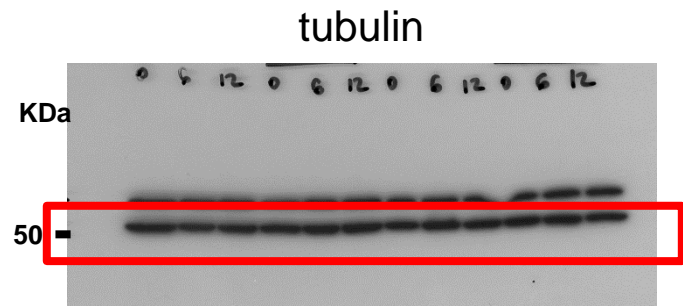

## Figure 3F

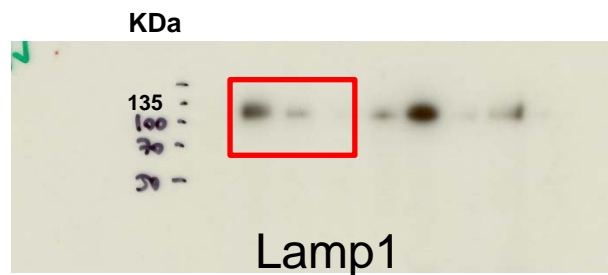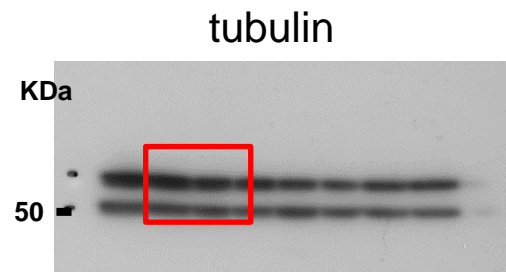

Supplement: emboj2013168df3.pdf [file emboj2013168df3.pdf]

# Source Data Figure 5

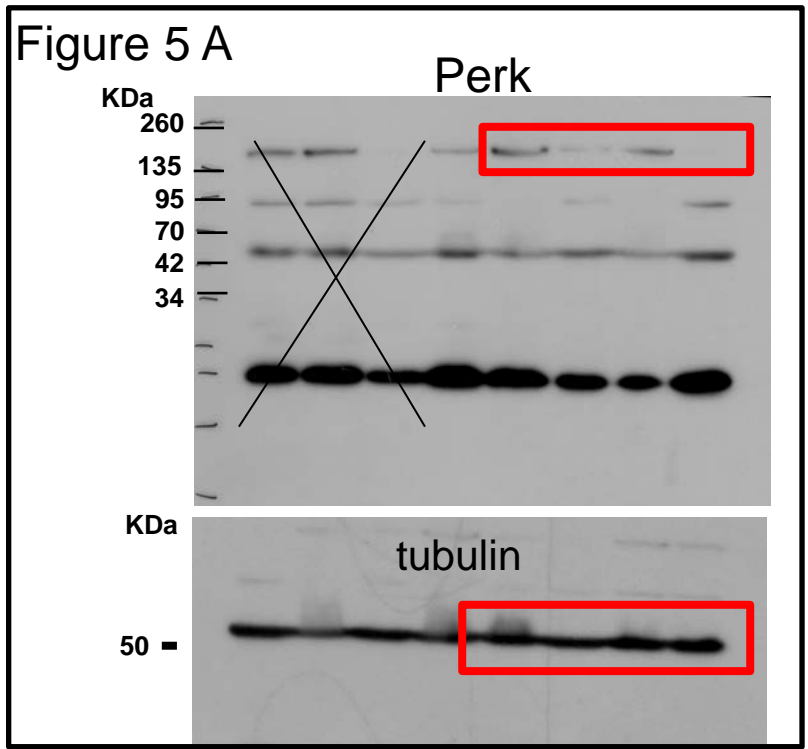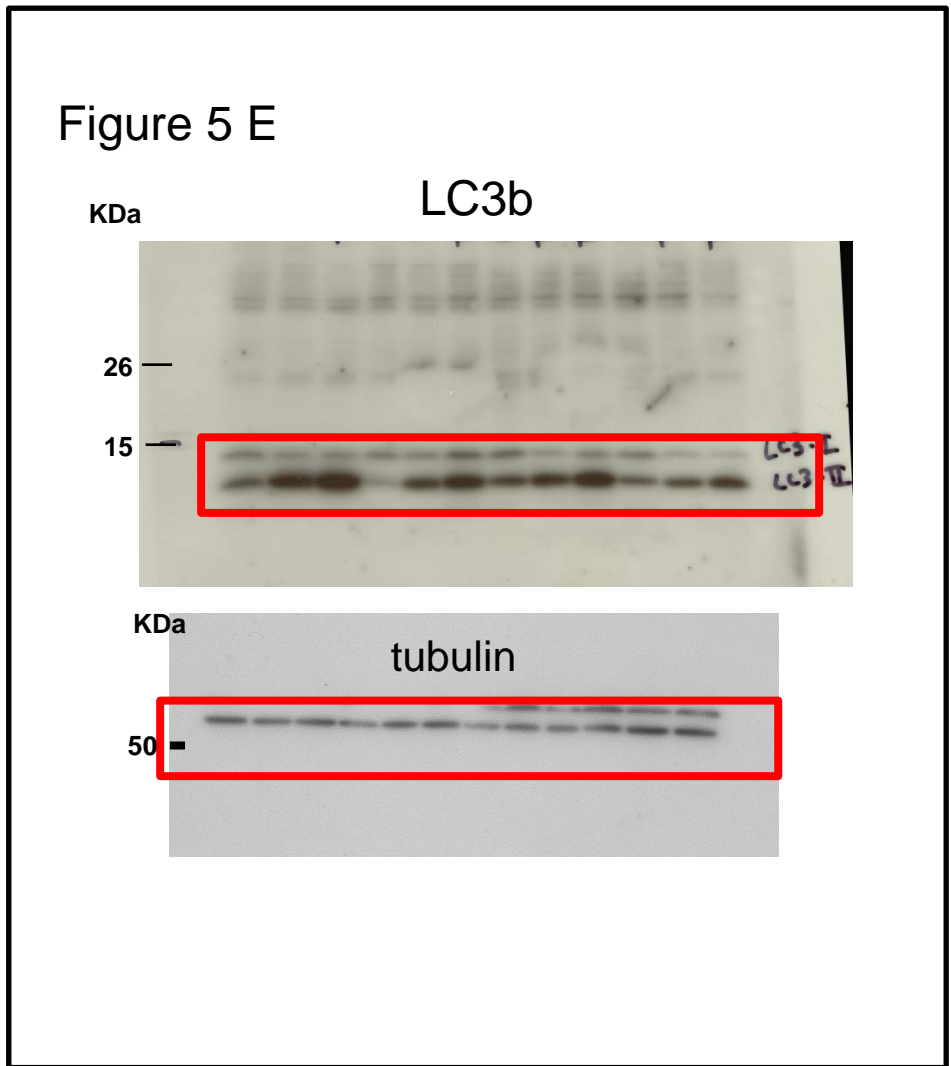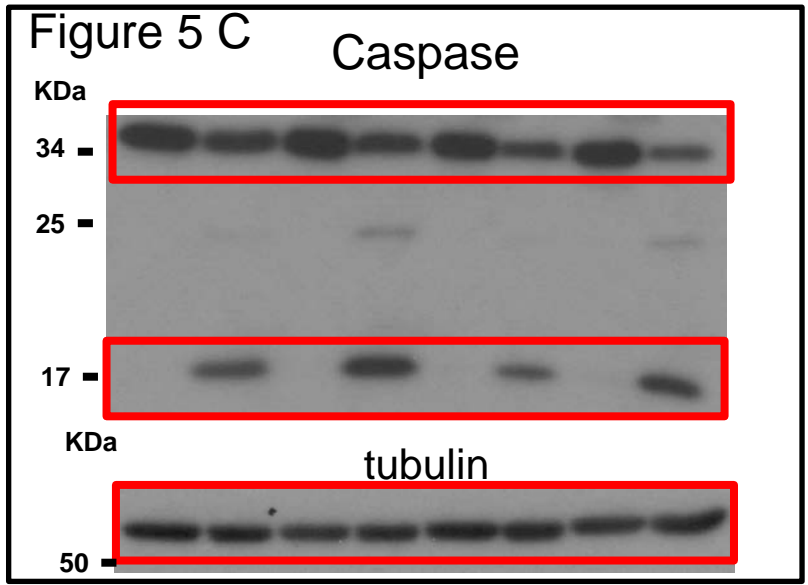

Supplement: emboj2013168df5.pdf [file emboj2013168df5.pdf]

# Source Data Figure 6

## Figure 6 A

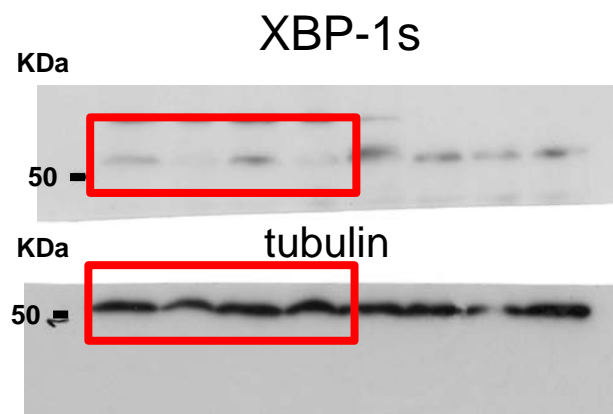

## Figure 6 C

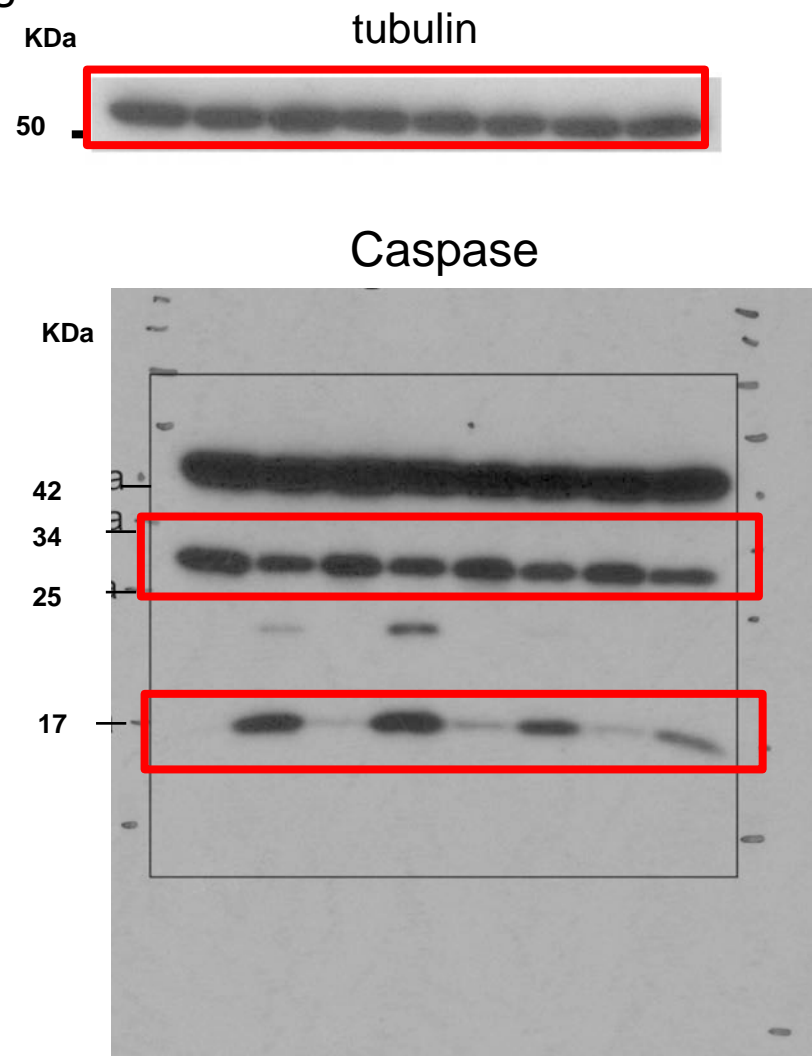

## Figure 6 E

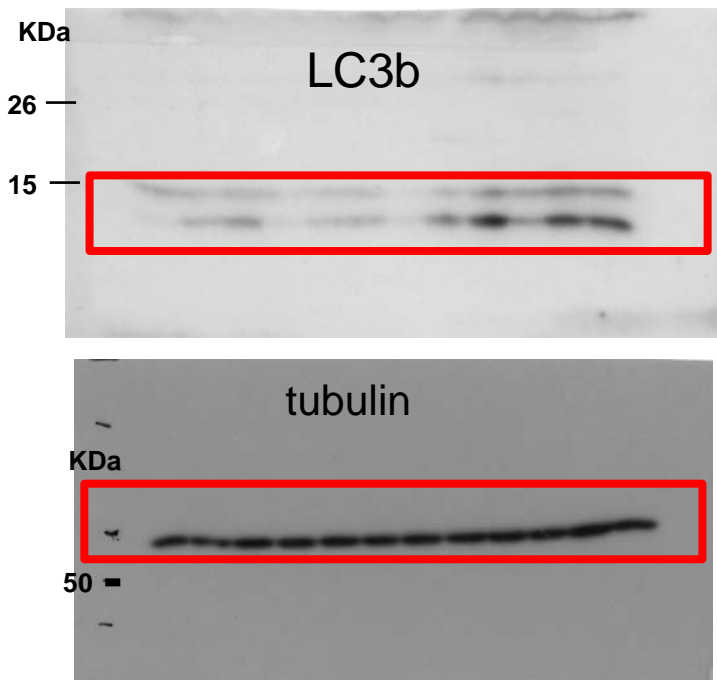

Supplement: emboj2013168df6.pdf [file emboj2013168df6.pdf]

Figure supplementary 2A

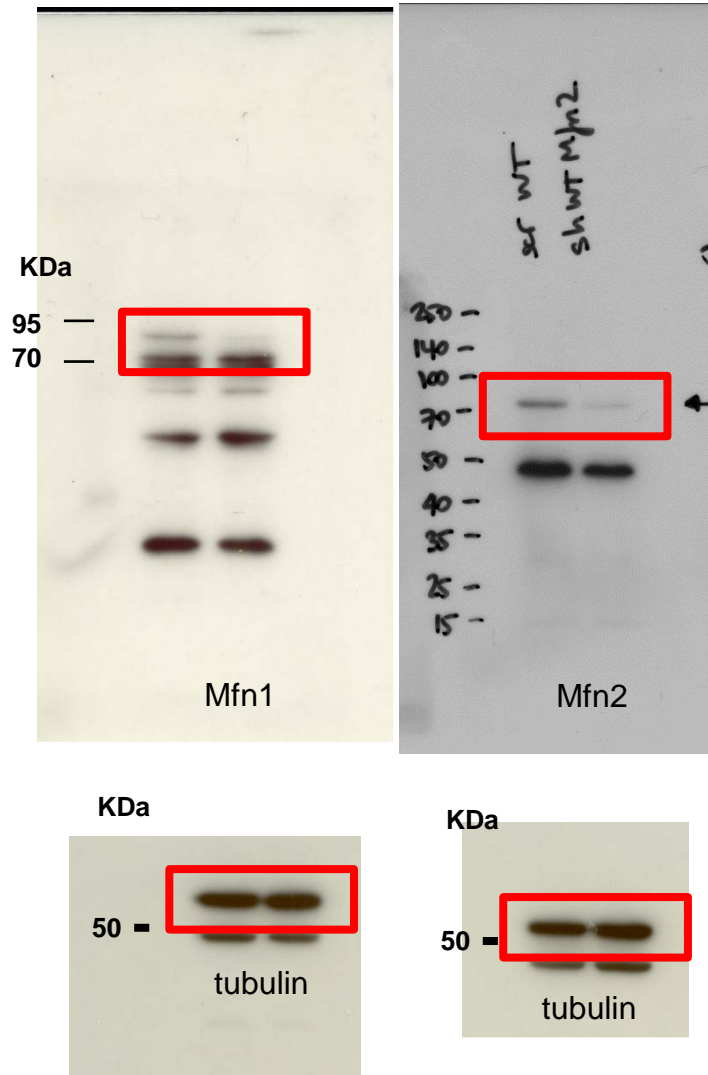

Supplement: emboj2013168dfs2.pdf [file emboj2013168dfs2.pdf]

Figure supplementary 4A

Mfn2

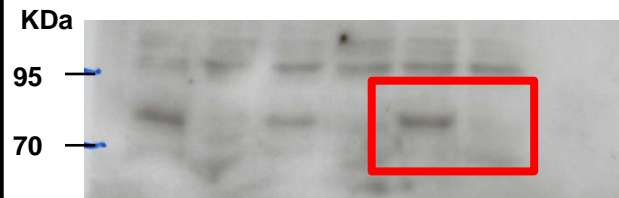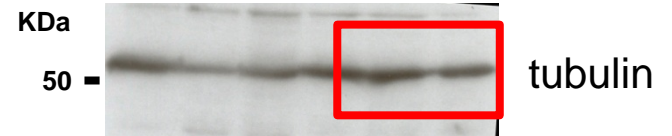

Figure supplementary 4C

Mfn2

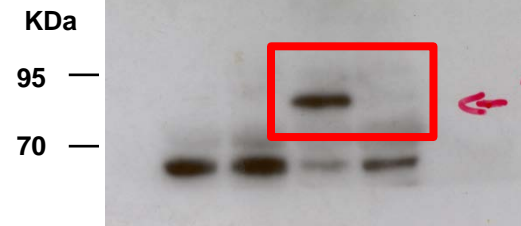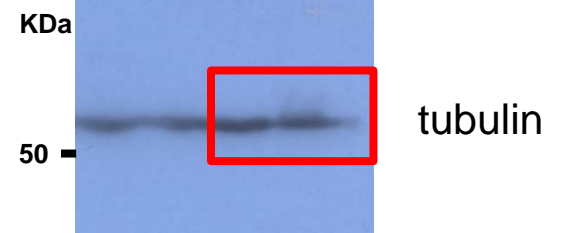

Supplement: emboj2013168dfs4.pdf [file emboj2013168dfs4.pdf]

Figure supplementary 5

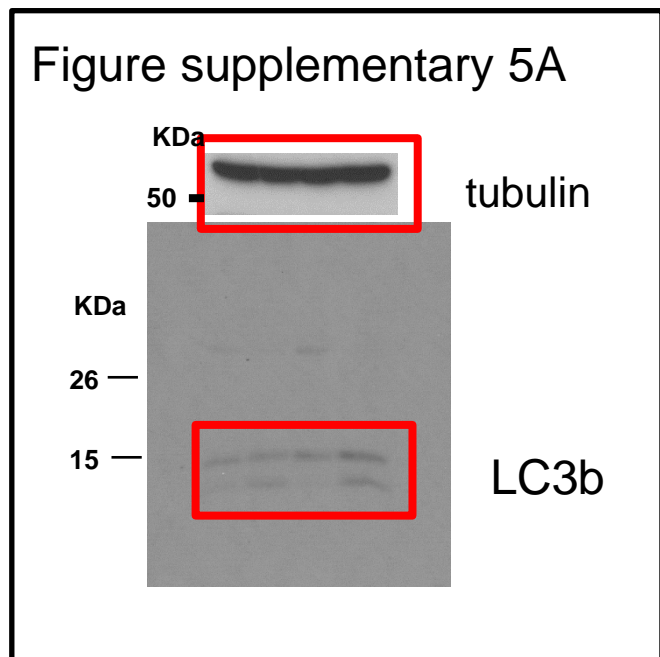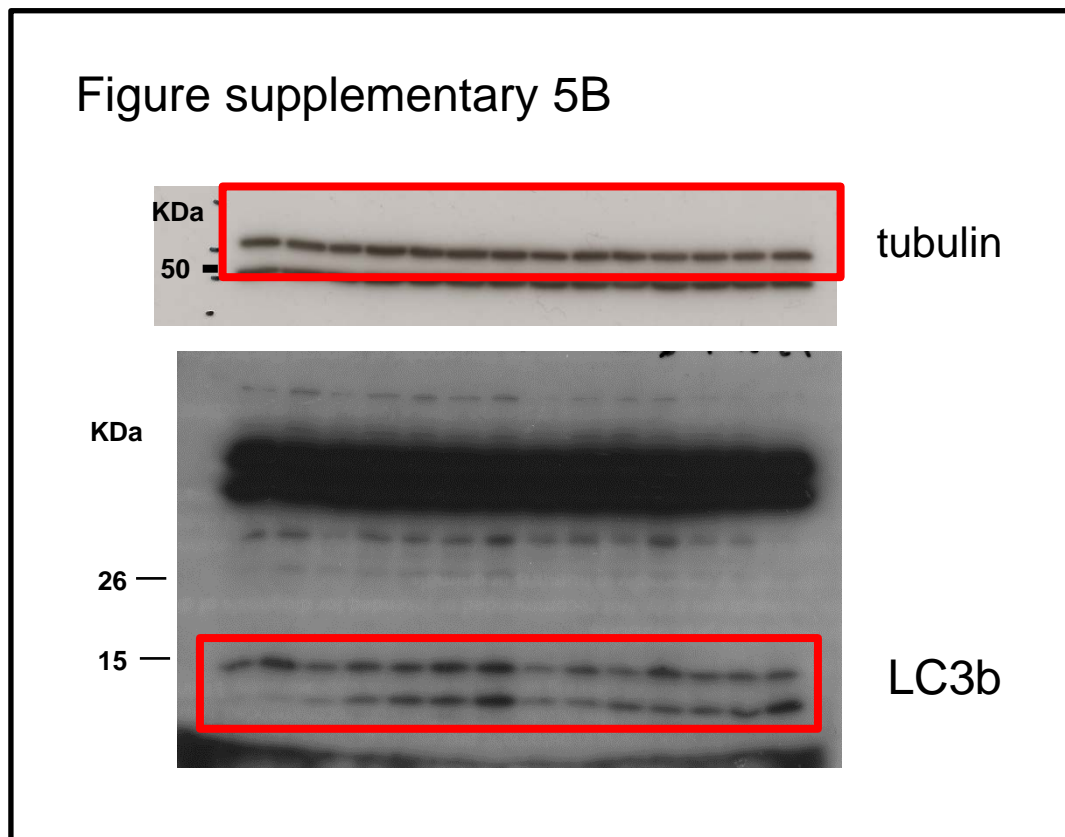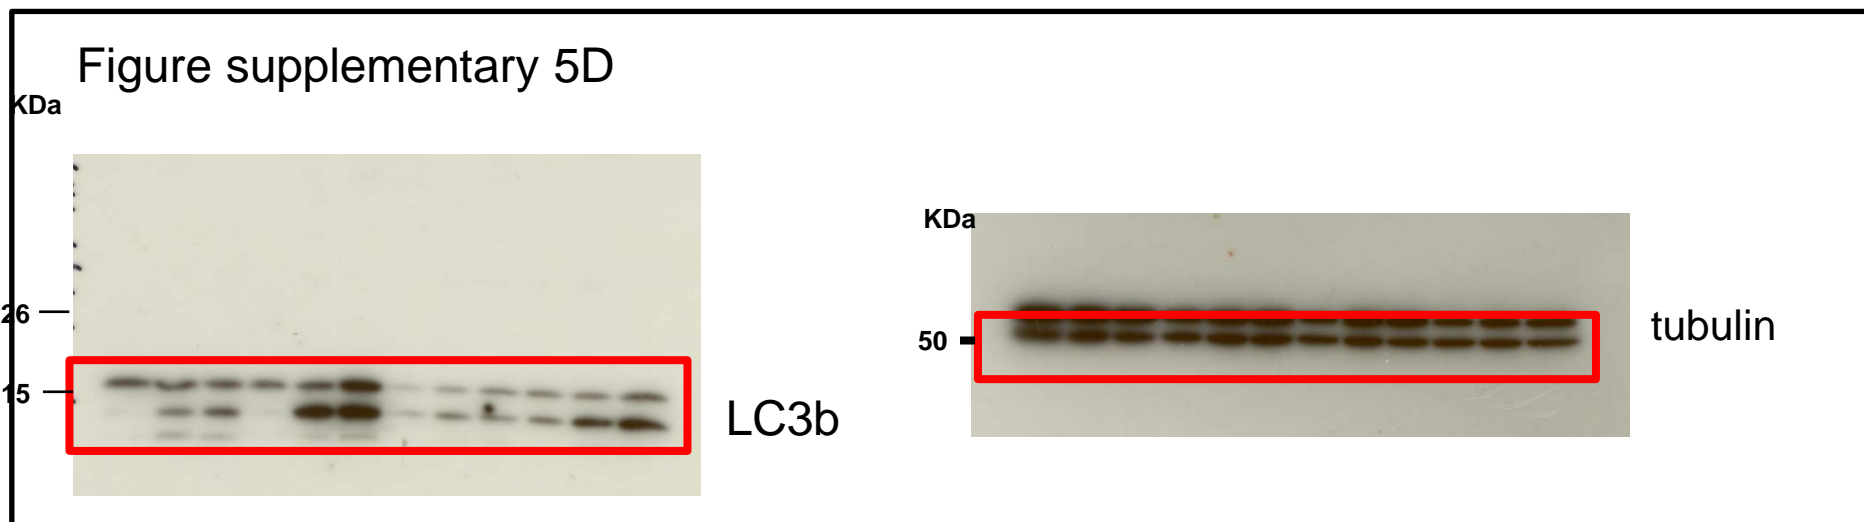

Figure supplementary 5F

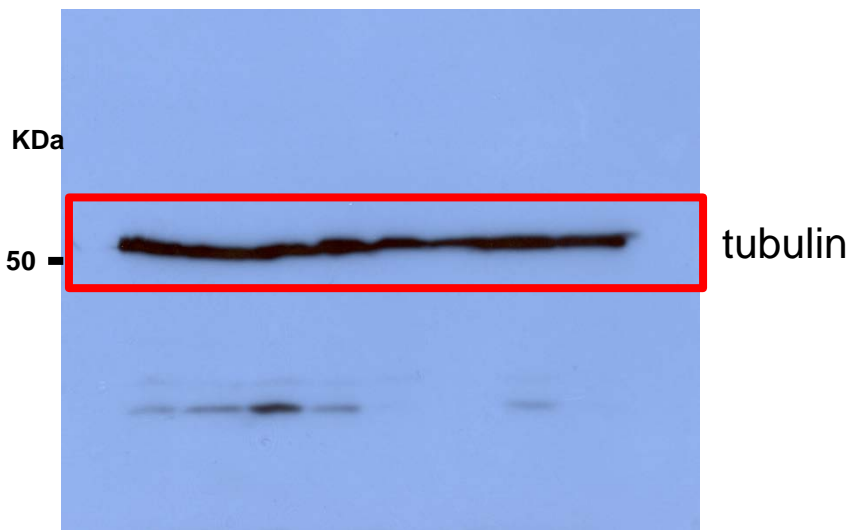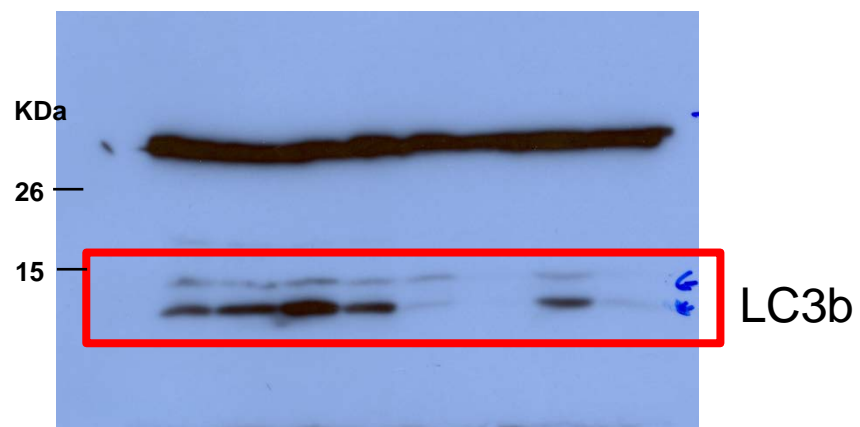

Figure supplementary 5G

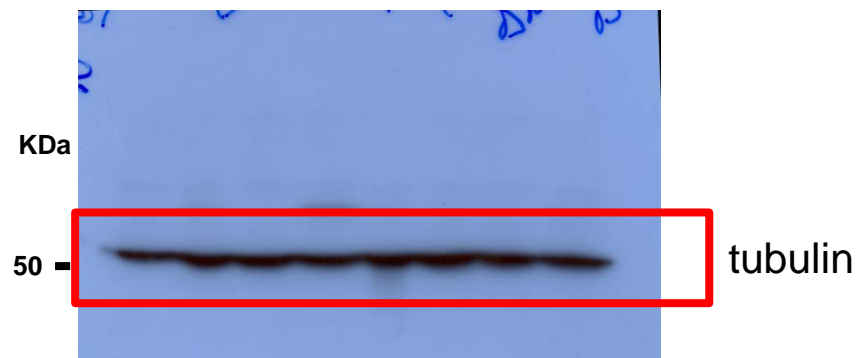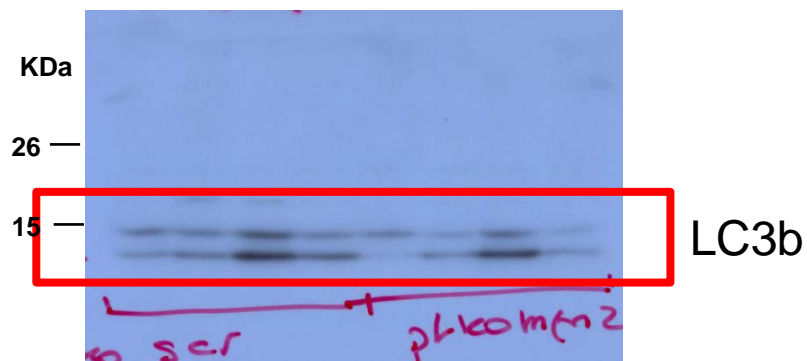

Supplement: emboj2013168dfs5.pdf [file emboj2013168dfs5.pdf]

Figure supplementary 6C

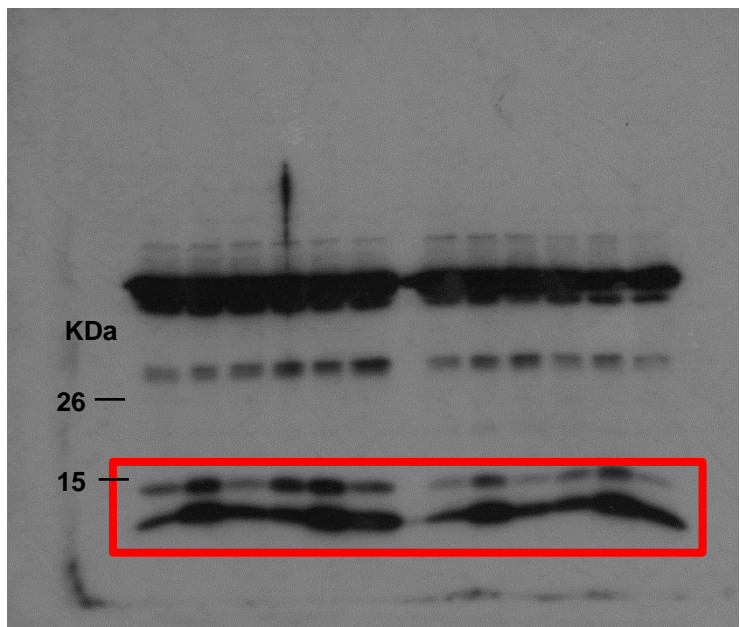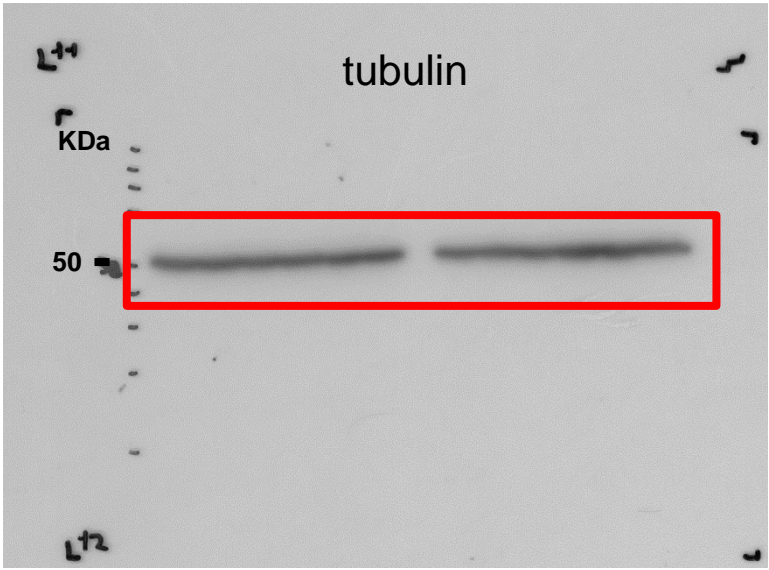

Figure supplementary 6F

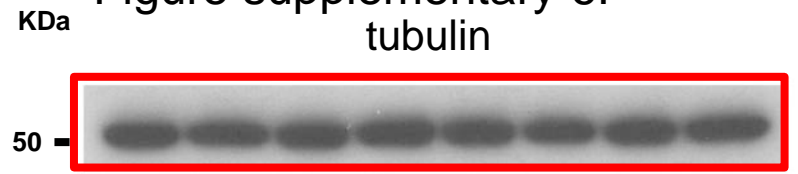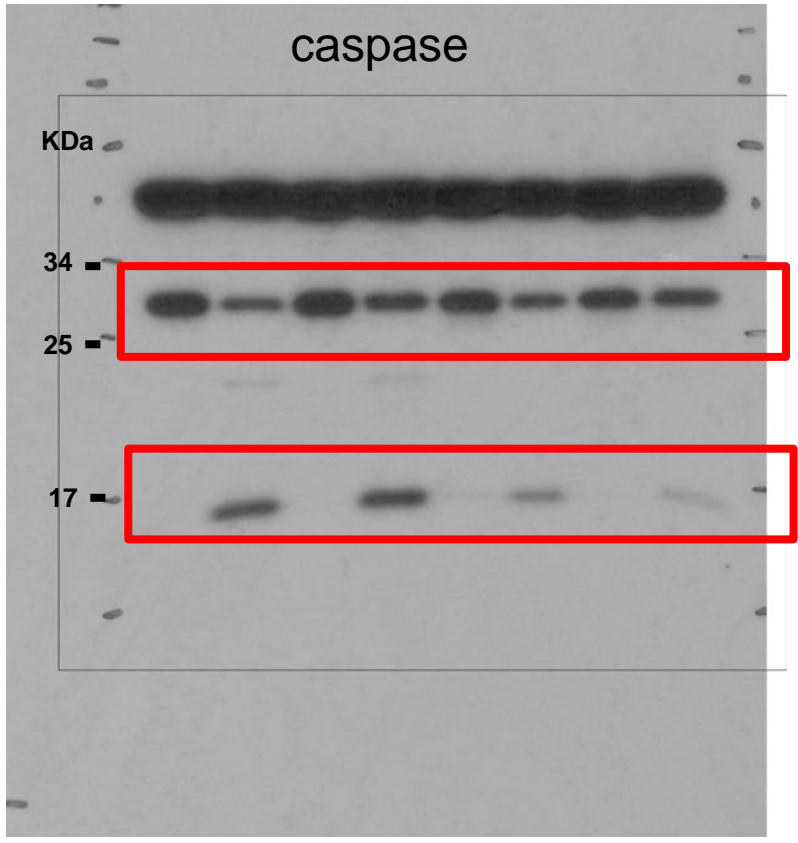

Supplement: emboj2013168dfs6.pdf [file emboj2013168dfs6.pdf]

Figure supplementary 8B

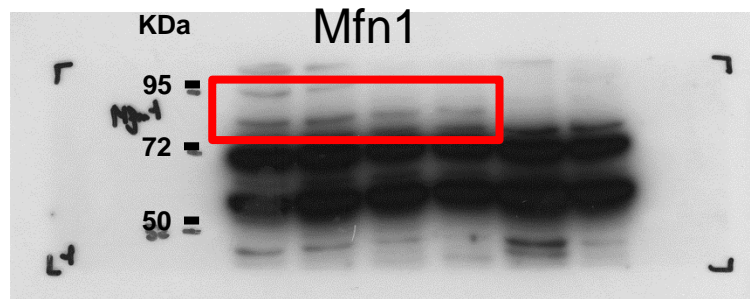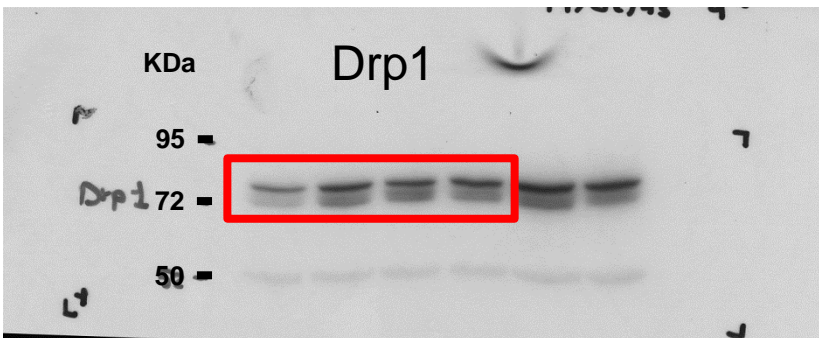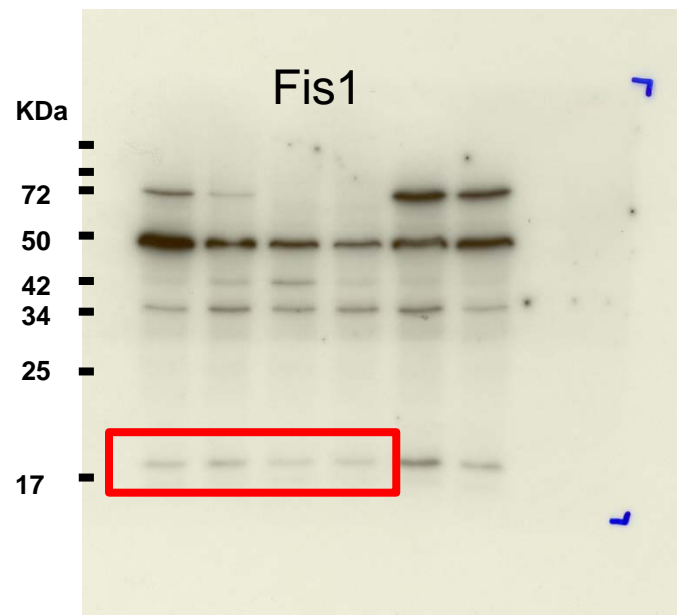

tubulin

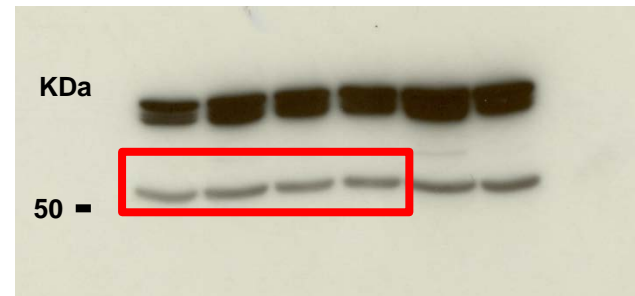

Figure supplementary 8C

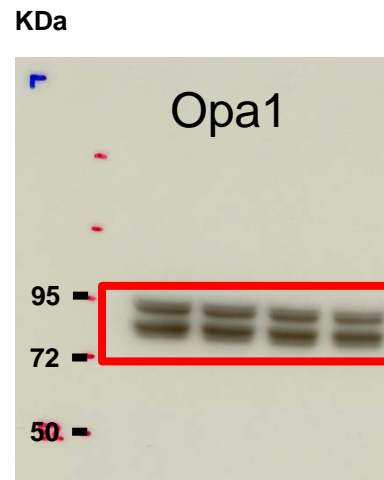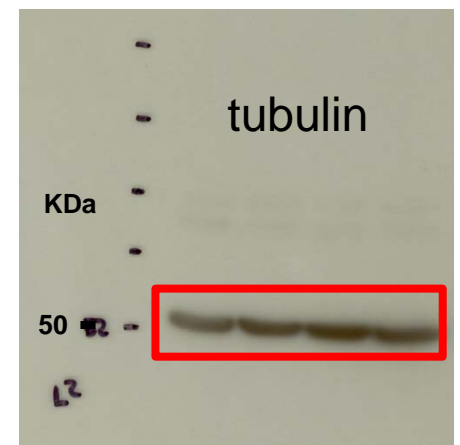

Supplement: emboj2013168dfs8.pdf [file emboj2013168dfs8.pdf]
